# Supplementary material
Source: ML conference proceedings conference paper supplement (https://proceedings.neurips.cc/paper_files/paper/2020/hash/a822554e5403b1d370db84cfbc530503-Abstract.html)
Supplement: Supplementary file [file a822554e5403b1d370db84cfbc530503-Supplemental.pdf]

## A Appendix

*Proof of Lemma 3.2.* Consider a dual space  $\bar{\mathcal{G}}$ : a set of functions  $\bar{g}_x : \text{co}^k(\mathcal{H}) \rightarrow \mathcal{Y}$  defined as  $\bar{g}_x(f) = f(x)$  for each  $f = \text{MAJ}(h_1, \dots, h_k) \in \text{co}^k(\mathcal{H})$  and each  $x \in \mathcal{X}$ . It follows by definition of dual VC dimension that  $\text{vc}(\bar{\mathcal{G}}) = \text{vc}^*(\text{co}^k(\mathcal{H}))$ . Similarly, define another dual space  $\mathcal{G}$ : a set of functions  $g : \mathcal{H} \rightarrow \mathcal{Y}$  defined as  $g(x) = h(x)$  for each  $h \in \mathcal{H}$  and each  $x \in \mathcal{X}$ . We know that  $\text{vc}(\mathcal{G}) = \text{vc}^*(\mathcal{H}) = d^*$ . Observe that by definition of  $\mathcal{G}$  and  $\bar{\mathcal{G}}$ , we have that for each  $x \in \mathcal{X}$  and each  $f = \text{MAJ}(h_1, \dots, h_k) \in \text{co}^k(\mathcal{H})$ ,

$$\bar{g}_x(f) = f(x) = \text{MAJ}(h_1, \dots, h_k)(x) = \text{sign} \left( \sum_{i=1}^k h_i(x) \right) = \text{sign} \left( \sum_{i=1}^k g_x(h_i) \right).$$

By the Sauer-Shelah Lemma applied to dual class  $\mathcal{G}$ , for any set  $H = \{h_1, \dots, h_n\} \subseteq \mathcal{H}$ , the number of possible behaviors

$$|\mathcal{G}|_H := |\{(g_x(h_1), \dots, g_x(h_n)) : x \in \mathcal{X}\}| \leq \binom{n}{\leq d^*}. \quad (3)$$

Consider a set  $F = \{f_1, \dots, f_m\} \subseteq \text{co}^k(\mathcal{H})$ , the number of possible behaviors can be upperbounded as follows:

$$\begin{aligned} |\bar{\mathcal{G}}|_F &= |\{(\bar{g}_x(f_1), \dots, \bar{g}_x(f_m)) : x \in \mathcal{X}\}| \\ &= |\{(\bar{g}_x(\text{MAJ}(h_1^1, \dots, h_1^k)), \dots, \bar{g}_x(\text{MAJ}(h_m^1, \dots, h_m^k))) : x \in \mathcal{X}\}| \\ &= \left| \left\{ \left( \text{sign} \left( \sum_{i=1}^k g_x(h_i^1) \right), \dots, \text{sign} \left( \sum_{i=1}^k g_x(h_i^m) \right) \right) : x \in \mathcal{X} \right\} \right| \\ &\stackrel{(i)}{\leq} |\{(g_x(h_1^1), \dots, g_x(h_1^k), g_x(h_2^1), \dots, g_x(h_2^k), \dots, g_x(h_m^1), \dots, g_x(h_m^k)) : x \in \mathcal{X}\}| \\ &\stackrel{(ii)}{\leq} \binom{mk}{\leq d^*}, \end{aligned}$$

where (i) follows from observing that each expanded vector  $(g_x(h_i^1), \dots, g_x(h_i^k))_{i=1}^m \in \mathcal{Y}^{mk}$  can map to at most one vector  $(\text{sign}(\sum_{i=1}^k g_x(h_i^1)), \dots, \text{sign}(\sum_{i=1}^k g_x(h_i^m))) \in \mathcal{Y}^m$ , and (ii) follows from Equation 3. Observe that if  $|\bar{\mathcal{G}}|_F < 2^m$ , then by definition,  $F$  is not shattered by  $\bar{\mathcal{G}}$ , and this implies that  $\text{vc}(\bar{\mathcal{G}}) < m$ . Thus, to conclude the proof, we need to find the smallest  $m$  such that  $\binom{mk}{\leq d^*} < 2^m$ . It suffices to check that  $m = O(d^* \log k)$  satisfies this condition.  $\square$

**Lemma A.1** (Montasser et al. [2019]). *For any  $k \in \mathbb{N}$  and fixed function  $\phi : (\mathcal{X} \times \mathcal{Y})^k \rightarrow \mathcal{Y}^{\mathcal{X}}$ , for any distribution  $P$  over  $\mathcal{X} \times \mathcal{Y}$  and any  $m \in \mathbb{N}$ , for  $S = \{(x_1, y_1), \dots, (x_m, y_m)\}$  iid  $P$ -distributed random variables, with probability at least  $1 - \delta$ , if  $\exists i_1, \dots, i_k \in \{1, \dots, m\}$  s.t.  $\hat{R}_{\mathcal{U}}(\phi((x_{i_1}, y_{i_1}), \dots, (x_{i_k}, y_{i_k})); S) = 0$ , then*

$$R_{\mathcal{U}}(\phi((x_{i_1}, y_{i_1}), \dots, (x_{i_k}, y_{i_k})); P) \leq \frac{1}{m - k} (k \ln(m) + \ln(1/\delta)).$$

*Proof of Theorem 3.5.* We begin with describing the construction of the adversary  $\mathcal{U}$ . Let  $m \in \mathbb{N}$ ; we will construct  $\mathcal{U}$  with  $|\mathcal{U}| = 2^m$ , supposing  $|\mathcal{X}| \geq 2 \binom{2^{10m}}{2^m} + 2^{10m}$ . Let  $Z = \{z_1, \dots, z_{2^{10m}}\} \subset \mathcal{X}$  be a set of  $2^{10m}$  unique points from  $\mathcal{X}$ . For each subset  $L \subset Z$  where  $|L| = 2^m$ , pick a unique pair  $x_L^+, x_L^- \in \mathcal{X} \setminus Z$  and define  $\mathcal{U}(x_L^+) = \mathcal{U}(x_L^-) = L$ . That is, for every choice  $L$  of  $2^m$  perturbations from  $Z$ , there is a corresponding pair  $x_L^+, x_L^-$  where  $\mathcal{U}(x_L^+) = \mathcal{U}(x_L^-) = L$ . For any point  $x \in \mathcal{X} \setminus Z$  that is remaining, define  $\mathcal{U}(x) = \{\}$ .

Let  $\mathcal{B}$  be an arbitrary reduction algorithm, and let  $\varepsilon > 0$  be the error requirement. We will now describe the construction of the target class  $\mathcal{C}$ . The target class  $\mathcal{C}$  will be constructed randomly. Namely, we will first define a labeling  $\tilde{h} : Z \rightarrow \mathcal{Y}$  on the perturbations in  $Z$  that is positive on the first half of  $Z$  and negative on the second half of  $Z$ :  $\tilde{h}(z_i) = +1$  if  $i \leq \frac{2^{10m}}{2}$ , and  $\tilde{h}(z_i) = -1$  if

$i > \frac{2^{10m}}{2}$ . Divide the positive/negative halves into groups of size  $2^m$ :

$$\underbrace{\{\text{first } 2^m \text{ positives}\}, \dots, \{\text{last } 2^m \text{ positives}\}}_{G_1^+} \mid \underbrace{\{\text{first } 2^m \text{ negatives}\}, \dots, \{\text{last } 2^m \text{ negatives}\}}_{G_1^-}.$$

Let  $\varepsilon' = \varepsilon/2$ . The target concept  $h^* : \mathcal{X} \rightarrow \mathcal{Y}$  is generated by randomly flipping the labels of an  $\varepsilon'$  fraction of the points in each group  $G_1^+, \dots, G_{2^{9m-1}}^+$  from positive to negative and randomly flipping the labels of an  $\varepsilon'$  fraction of the points in each group  $G_1^-, \dots, G_{2^{9m-1}}^-$  from negative to positive. This defines  $h^*$  on  $Z$ ; then for every pair  $x^+, x^- \in \mathcal{X} \setminus Z$  where  $U(x^+) = U(x^-) \neq \{\}$ , define  $h^*(x^+) = +1$  and  $h^*(x^-) = -1$ . Once  $h^*$  is generated, we define the distribution  $D_{h^*}$  over  $\mathcal{X} \times \mathcal{Y}$  that will be used in the lower bound by swapping the  $\varepsilon'$  fractions of points with the flipped labels in each pair  $(G_1^+, G_1^-), \dots, (G_{2^{9m-1}}^+, G_{2^{9m-1}}^-)$  which defines new positive/negative pairs:  $(G(h^*)_1^+, G(h^*)_1^-), \dots, (G(h^*)_{2^{9m-1}}^+, G(h^*)_{2^{9m-1}}^-)$ . Let  $x_i^+, - = U^{-1}(G(h^*)_i^+)$  and  $-, x_i^- = U^{-1}(G(h^*)_i^-)$  for each  $i \in [2^{9m-1}]$  ( $U^{-1}$  returns a pair of points). Observe that by definition of  $h^*$  on  $\mathcal{X} \setminus Z$ , we have that  $h^*(x_i^+) = +1$  and  $h^*(x_i^-) = -1$  since  $h^*(z) = +1 \forall z \in G(h^*)_i^+$  and  $h^*(z) = -1 \forall z \in G(h^*)_i^-$ . Let  $D_{h^*}$  be a uniform distribution over  $(x_1^+, +1), (x_1^-, -1), \dots, (x_{2^{9m-1}}^+, +1), (x_{2^{9m-1}}^-, -1)$ .

Let  $T \leq \frac{\log 2^m}{\log(1/\varepsilon')}$ . Define a randomly-constructed target class  $\mathcal{C} = \{h_1, \dots, h_T, h_{T+1}\}$  where  $h_{T+1} = h^*$  and  $h_1, h_2, \dots, h_T$  are generated according the following process: If  $t = 1$ , then  $h_1 := \tilde{h}$  (augmented to all of  $\mathcal{X}$  by letting  $\tilde{h}(x) = h^*(x)$  for all  $x \in \mathcal{X} \setminus Z$ ). For  $t \geq 2$ , let  $\text{DIS}_{t-1} = \{z \in Z : h_{t-1}(z) \neq h^*(z)\}$ , and construct  $h_t$  by flipping a uniform randomly-selected  $1 - \varepsilon'$  fraction of the labels of  $h_{t-1}$  in  $G_i^+ \cap \text{DIS}_{t-1}$  and  $1 - \varepsilon'$  fraction of the labels of  $h_{t-1}$  in  $G_i^- \cap \text{DIS}_{t-1}$  for each  $i \in [2^{9m-1}]$ . Observe that by construction,  $h_1, \dots, h_T$  satisfy the property that they agree with  $h^*$  on  $\mathcal{X} \setminus Z$ , i.e.  $h_t(x) = h^*(x)$  for each  $t \leq T$  and each  $x \in \mathcal{X} \setminus Z$ .

We now state a few properties of the randomly-constructed target class  $\mathcal{C}$  that we will use in the remainder of the proof. First, observe that by definition of  $\text{DIS}_t$  for  $t \leq T$ , we have that  $G_i^\pm \cap \text{DIS}_T \subseteq G_i^\pm \cap \text{DIS}_{T-1} \subseteq \dots \subseteq G_i^\pm \cap \text{DIS}_1$  for each  $1 \leq i \leq 2^{9m-1}$ . In addition,

$$|G_i^\pm \cap \text{DIS}_t| \geq \varepsilon' |G_i^\pm \cap \text{DIS}_{t-1}| \text{ for each } 1 \leq i \leq 2^{9m-1}.$$

By the random process generating  $h^*$ , we also know that  $|G_i^\pm \cap \text{DIS}_1| \geq \varepsilon' 2^m$ . Combined with the above, this implies that:

$$|G_i^\pm \cap \text{DIS}_T| \geq \varepsilon'^T 2^m \text{ for each } 1 \leq i \leq 2^{9m-1}.$$

So, for  $T \leq \frac{\log 2^m}{\log(2/\varepsilon')}$ , we are guaranteed that  $|G_i^\pm \cap \text{DIS}_T| \geq 1$  for each  $1 \leq i \leq 2^{9m-1}$ .

We now describe the construction of a PAC learner  $\mathcal{A}$  with  $\text{vc}(\mathcal{A}) = 1$  for the randomly generated concept  $h^*$  above; we assume that  $\mathcal{A}$  knows  $\mathcal{C}$  (but of course,  $\mathcal{B}$  does not know  $\mathcal{C}$ ).

---

**Algorithm 2:** Non-Robust PAC Learner  $\mathcal{A}$

---

**Input:** Distribution  $P$  over  $\mathcal{X}$ .

**Output:**  $h_s$  for the *smallest*  $s \in [T]$  with  $\text{err}_P(h_s, h^*) \leq \varepsilon$  (or outputting  $h_{T+1} = h^*$  if no such  $s$  exists).

---

First, we will show that  $\text{vc}(\mathcal{A}) = 1$ . By definition of  $\mathcal{A}$ , it suffices to show that  $\text{vc}(\mathcal{C}) = \text{vc}(\{h^*, h_1, \dots, h_T\}) = 1$ . By definition of  $h^*$  and  $h_1$ , it is easy to see that there is a  $z \in Z$  where  $h^*(z) \neq h_1(z)$ , and thus  $\text{vc}(\mathcal{C}) \geq 1$ . Observe that by construction, each predictor in  $h_1, \dots, h_T$  operates as a threshold in each group  $G_1^+, G_1^-, \dots, G_{2^{9m-1}}^+, G_{2^{9m-1}}^-$  (ordered according to the order in which the labels are flipped in the  $h_1, \dots, h_T$  sequence). As a result, each  $x \in \mathcal{X}$  has its label flipped at most once in the sequence  $(h_1(x), \dots, h_T(x), h^*(x))$ . This is because once the ground-truth label of  $x$ ,  $h^*(x)$ , is revealed by some  $h_t$  (i.e.,  $h_t(x) = h^*(x)$ ), all subsequent predictors  $h_{t'}$  satisfy  $h_{t'}(x) = h^*(x)$ . Thus, for any two points  $z, z' \in \mathcal{X}$ , the number of possible behaviors  $|\{(h(z), h(z')) : h \in \mathcal{C}\}| \leq 3$ . Therefore,  $\mathcal{C}$  cannot shatter two points. This proves that  $\text{vc}(\mathcal{C}) \leq 1$ .

**Analysis** Suppose that we run the reduction algorithm  $\mathcal{B}$  with non-robust learner  $\mathcal{A}$  for  $T$  rounds to obtain predictors  $h_{s_1} = \mathcal{A}(P_1), \dots, h_{s_T} = \mathcal{A}(P_T)$ . We will show that  $\Pr_{h^*} [s_T \leq T | S] > 0$ ,

meaning that with non-zero probability learner  $\mathcal{A}$  will not reveal the ground-truth hypothesis  $h^*$ . For  $t \leq T$ , let  $E_t$  denote the event that  $\text{err}_{P_t}(h_{s_{t-1}+1}, h^*) \leq \varepsilon$ . When conditioning on  $S, s_1, \dots, s_{t-1}$ , observe that by construction of the randomized hypothesis class  $\mathcal{C}$ , for each  $i \leq 2^{9m-1}$  such that  $\{(x_i^-, -1), (x_i^+, +1)\} \cap S = \emptyset$ , and each  $z \in G_i^\pm \cap \text{DIS}_{s_{t-1}}$ :  $\Pr_{h^*} [h^*(z) \neq h_{s_{t-1}+1}(z) | S, s_1, \dots, s_{t-1}] \leq \varepsilon' = \varepsilon/2$ . It follows then by the law of total probability that for any distribution  $P_t$  constructed by  $\mathcal{A}$ :

$$\mathbb{E}_{h^*} [\text{err}_{P_t}(h_{s_{t-1}+1}, h^*) | S, s_1, \dots, s_{t-1}] \leq \frac{\varepsilon}{2}.$$

By Markov's inequality, it follows that

$$\begin{aligned} \Pr_{h^*} [\bar{E}_t | S, s_1, \dots, s_{t-1}] &= \Pr_{h^*} [\text{err}_{P_t}(h_{s_{t-1}+1}, h^*) > \varepsilon | S, s_1, \dots, s_{t-1}] \\ &\leq \frac{\mathbb{E}_{h^*} [\text{err}_{P_t}(h_{s_{t-1}+1}, h^*) | S, s_1, \dots, s_{t-1}]}{\varepsilon} \leq \frac{1}{2}. \end{aligned}$$

By law of total probability,

$$\Pr_{h^*} [s_T \leq T | S] \geq \Pr_{h^*} [E_1 | S] \times \Pr_{h^*} [E_2 | S, E_1] \times \dots \times \Pr_{h^*} [E_T | S, E_1, \dots, E_{T-1}] \geq \left(\frac{1}{2}\right)^T > 0.$$

To conclude the proof, we will show that if the reduction algorithm  $\mathcal{B}$  sees at most  $1/2$  of the support of distribution  $D_{h^*}$  through a training set  $S$  and makes only  $T \leq \frac{\log 2^m}{\log(2/\varepsilon)}$  oracle calls to  $\mathcal{A}$ , then it will likely fail in robustly learning  $h^*$ . For each  $i \leq 2^{9m-1}$ , conditioned on the event that  $\{(x_i^-, -1), (x_i^+, +1)\} \cap S = \emptyset$ , and conditioned on  $h_{s_1}, \dots, h_{s_T}$ , there is a  $z \in Z$  that is equally likely to be in  $\mathcal{U}(x_i^-)$  or  $\mathcal{U}(x_i^+)$ . To see why such a point exists, we first describe an equivalent distribution generating  $h^*, h_1, \dots, h_T$ . For each  $i \leq 2^{9m-1}$  randomly select a  $2\varepsilon'$  fraction of points from  $G_i^+$  and a  $2\varepsilon'$  fraction of points from  $G_i^-$ . Then, randomly pair the points in each  $2\varepsilon'$  fraction to get  $\varepsilon'2^m$  pairs  $z_i, z'_i$  for each  $G_i^\pm$ . For each pair  $z_i, z'_i$  flip a fair coin  $c_i$ : if  $c_i = 1$ ,  $z_i$ 's label gets flipped and otherwise if  $c_i = 0$  then  $z'_i$ 's label gets flipped. This is equivalent to generating  $h^*$  by flipping the labels of a uniform randomly-selected  $\varepsilon$  fraction of points in each  $G_i^\pm$  as originally described, but is helpful book-keeping that simplifies our analysis. In addition,  $h_1, \dots, h_T$  can be generated in a similar fashion. Since  $T \leq \frac{\log 2^m}{\log(2/\varepsilon)}$ , we are guaranteed that  $|G_i^\pm \cap \text{DIS}_{s_T}| \geq 1$ . By definition of  $\text{DIS}_{s_T}$ , this implies that there is a pair of points  $z_i, z'_i$  in each  $G_i^\pm$  where each  $h_{s_t}(z_i) = h_{s_t}(z'_i)$  for  $t \leq T$  but  $h^*(z_i) \neq h^*(z'_i)$  (i.e., each  $h_{s_t}$  never reveals the ground-truth label for at least one pair). And then in the end, if  $\{(x_i^-, -1), (x_i^+, +1)\} \cap S = \emptyset$ ,  $\mathcal{B}$  will make some prediction on  $z_i$ , and the posterior probability of it being wrong is  $1/2$ .

More formally, for any training dataset  $S \sim D_{h^*}^{|S|}$  where  $|S| \leq 2^{9m-3}$ , any  $h_{s_1}, \dots, h_{s_T}$  returned by  $\mathcal{A}$  where  $T \leq \frac{\log 2^m}{\log(2/\varepsilon)}$ , and any predictor  $f: \mathcal{X} \rightarrow \mathcal{Y}$  that is picked by  $\mathcal{B}$ :

$$\begin{aligned} \mathbb{E}_{h^*} [\text{RU}(f; D_{h^*}) | S, h_{s_1}, \dots, h_{s_T}] &\geq \mathbb{E}_{h^*} \left[ \frac{1}{2^{9m}} \sum_{\substack{(x,y) \notin S, \\ (x,y) \in \text{supp}(D_{h^*})}} \sup_{z \in \mathcal{U}(x)} \mathbb{1}[f(z) \neq y] \middle| S, h_{s_1}, \dots, h_{s_T} \right] \\ &= \frac{1}{2^{9m}} \sum_{i=1}^{2^{9m-1}} \Pr_{h^*} [((x_i^+, +1), (x_i^-, -1)) \notin S] \wedge \\ &\quad \left( \exists z \in \mathcal{U}(x_i^+) \text{ s.t. } f(z) \neq +1 \vee \exists z \in \mathcal{U}(x_i^-) \text{ s.t. } f(z) \neq -1 \right) \middle| S, h_{s_1}, \dots, h_{s_T} \\ &\geq \frac{2^{9m-1}}{2^{9m}} \frac{1}{2} = \frac{1}{4}. \end{aligned}$$

This implies that, for any  $\mathcal{B}$  limited to  $n \leq 2^{9m-3}$  training examples and  $T \leq \frac{m}{\log_2(2/\varepsilon)}$  queries, there exists a *deterministic* choice of  $h^*$  and  $h_1, \dots, h_T$ , and a corresponding learner  $\mathcal{A}$  that is a

PAC learner for  $\{h^*\}$  using hypothesis class  $\{h^*, h_1, \dots, h_T\}$  of VC dimension 1, such that, for  $S \sim D_{h^*}^n$ ,  $\mathbb{E}_S[\mathbb{R}_{\mathcal{U}}(f; D_{h^*})] \geq \frac{1}{4}$ .  $\square$

*Proof sketch of Claim 4.2.* Let  $\mathcal{B}$  be an arbitrary reduction algorithm. Let  $x_0, x_1 \in \mathcal{X}$ , and  $k \in \mathbb{N}$ . Pick arbitrary points  $Z = \{z_1, \dots, z_{2k}\} \subseteq \mathcal{X}$ . Let  $X = \{x_0, x_1\} \cup Z$ . Let  $b \in \{0, 1\}^{2k}$  be a bit string drawn uniformly at random from the set  $\{b \in \{0, 1\}^{2k} : \sum_i b_i = k\}$ , think of this as a random partition of  $Z$  into two equal sets  $Z_0$  and  $Z_1$ . For each  $y \in \{0, 1\}$ , define  $\mathcal{U}_b(x_y)$  to include  $x_y$  and all perturbations  $z \in Z_y$ . Also, for each  $z \in Z$  define  $\mathcal{U}_b(z) = \{z\}$ . Similarly, define target class  $\mathcal{C}_b$  to include only a single hypothesis  $c_b$  where  $c_b(\mathcal{U}(x_0)) = 0$  and  $c_b(\mathcal{U}(x_1)) = 1$ . We will consider an ERM that uses the set of thresholds  $\mathcal{H}_\phi = \{x \mapsto \mathbb{1}[\phi(x) \geq \theta] : \theta \in \mathbb{R}\}$  as its hypothesis class, where  $\phi$  is a random embedding such that for each  $z_0 \in \mathcal{U}_b(x_0)$  and each  $z_1 \in \mathcal{U}_b(x_1)$ :  $\phi(z_0) < \phi(z_1)$ ; this guarantees that the random hypothesis  $c_b$  is realized by some  $h \in \mathcal{H}_\phi$ . On any input  $L \subseteq X \times \{0, 1\}$ , we define the ERM to return the earliest possible threshold that reveals as few 0's as possible.

Since algorithm  $\mathcal{B}$  only sees training data  $S = \{(x_0, 0), (x_1, 1)\}$  as its input, by picking  $b$  uniformly at random,  $\mathcal{B}$  has no way of knowing which perturbations belong to  $\mathcal{U}(x_0)$  and which belong to  $\mathcal{U}(x_1)$ , and therefore its forced to call the mistake oracle  $\mathcal{O}_{\mathcal{U}}$  at least  $k$  times. The ERM oracle is designed such that it will reveal as little information about this as possible.

Suppose that we run algorithm  $\mathcal{B}$  for  $T$  rounds, where in each round  $t \leq T$ ,  $\mathcal{B}$  maintains a predictor  $f_t : X \rightarrow \{0, 1\}$  that determines the labeling of  $x_0, x_1$  and the set of perturbations  $Z$ . We will show that, in expectation over the random choice of  $b$  and  $\phi$ , in order for the final predictor  $f_T$  outputted by  $\mathcal{B}$  to have robust loss zero on  $S$ , i.e.  $\mathbb{R}_{\mathcal{U}_b}(f_T) = 0$ , the number of rounds  $T$  needs to be at least  $k$ .

On each round  $t \leq T$ ,  $\mathcal{B}$  is allowed to:

1. Query the mistake oracle  $\mathcal{O}_{\mathcal{U}}$  with a query consisting of some predictor  $g_t : X \rightarrow \{0, 1\}$  and a point  $(x, y) \in X \times \{0, 1\}$ .
2. Query the ERM oracle with a dataset  $L_t \subseteq X \times \{0, 1\}$ .

Let  $M_t = \sum_{z \in Z} \mathbb{1}[f_t(z) \neq c_b(z)]$  be the number of mistakes at round  $t$ , and let  $H_t = \{g_j, (x_j, y_j), L_j\}_{j \leq t}$  denote the history of queries. Then, observe that

$$\mathbb{E}_{b, \phi} [M_t | M_{t-1}, H_{t-1}] \geq M_{t-1} - 1.$$

This is because oracle  $\mathcal{O}_{\mathcal{U}}$  reveals the ground truth label of at most 1 point at round  $t$ , and the ERM will move the threshold by at most one position. This implies that  $\mathbb{E}_{b, \phi} [M_T | M_0, H_0] \geq M_0 - T$ . We can further condition on the event that  $M_0 \geq k$  which has non-zero probability (since  $b$  is picked uniformly at random). This implies, by the probabilistic method, that there exists  $b, \phi$  such that for  $T \leq k - 1$ ,  $M_T \geq 1$ . Therefore, by definition of  $M_T$ ,  $f_T$  is not be robustly correct on  $S$  for  $T \leq k - 1$ .  $\square$

*Proof of Theorem 4.4.* Let  $\mathcal{U}$  be an arbitrary adversary and  $\mathcal{O}_{\mathcal{U}}$  its corresponding mistake oracle. Let  $\mathcal{C} \subseteq \mathcal{Y}^{\mathcal{X}}$  be an arbitrary target class, and  $\mathcal{A}$  an online learner for  $\mathcal{C}$  with mistake bound  $M_{\mathcal{A}} < \infty$ . We assume w.l.o.g. that the online learner  $\mathcal{A}$  is conservative, meaning that it does not update its state unless it makes a mistake. Algorithm 3 in essence is a standard conversion of a learner in the mistake bound model to a learner in the PAC model (see e.g. Balcan [2010]):

---

**Algorithm 3:** Robust Learner with a Mistake Oracle.

---

**Input:**  $S = \{(x_1, y_1), \dots, (x_m, y_m)\}$ ,  $\varepsilon, \delta$ , black-box access to an online learner  $\mathcal{A}$ , black-box access to a mistake oracle  $\mathcal{O}_{\mathcal{U}}$

- 1 Initialize  $h_0 = \mathcal{A}(\emptyset)$ .
- 2 **for**  $i \leq m$  **do**
- 3     Certify the robustness of  $h$  on  $(x_i, y_i)$  by asking the mistake oracle  $\mathcal{O}_{\mathcal{U}}$ .
- 4     If  $h_t$  is not robust on  $(x_i, y_i)$ , update  $h_t$  by running  $\mathcal{A}$  on  $(z, y_i)$ , where  $z$  is the perturbation returned by  $\mathcal{O}_{\mathcal{U}}$ .
- 5     Break when  $h_t$  is robustly correct on a consecutive sequence of length  $\frac{1}{\varepsilon} \log \left( \frac{M_{\mathcal{A}}}{\delta} \right)$ .

**Output:**  $h_t$ .

---

**Analysis** Let  $\mathcal{D}$  be an arbitrary distribution over  $\mathcal{X} \times \mathcal{Y}$  that is robustly realizable with some concept  $c \in \mathcal{C}$ , i.e.,  $R_{\mathcal{U}}(c; \mathcal{D}) = 0$ . Fix  $\varepsilon, \delta \in (0, 1)$  and a sample size  $m = 2 \frac{M_{\mathcal{A}}}{\varepsilon} \log \left( \frac{M_{\mathcal{A}}}{\delta} \right)$ .

Since online learner  $\mathcal{A}$  has a mistake bound of  $M_{\mathcal{A}}$ , Algorithm 3 will terminate in at most  $\frac{M_{\mathcal{A}}}{\varepsilon} \log \left( \frac{M_{\mathcal{A}}}{\delta} \right)$  steps of certification, which of course is an upperbound on the number of calls to the mistake oracle  $O_{\mathcal{U}}$ , and the number of calls to the online learner  $\mathcal{A}$ .

It remains to show that the output of Algorithm 3, the final predictor  $h$ , has low robust risk  $R_{\mathcal{U}}(h; \mathcal{D})$ . Throughout the runtime of Algorithm 3, the online learner can generate a sequence of at most  $M_{\mathcal{A}} + 1$  predictors. There's the initial predictor from Step 1, plus the  $M_{\mathcal{A}}$  updated predictors corresponding to potential updates by online learner  $\mathcal{A}$ . Observe that the probability that the final  $h$  has robust risk more than  $\varepsilon$

$$\Pr_{S \sim \mathcal{D}^m} [R_{\mathcal{U}}(h; \mathcal{D}) > \varepsilon] \leq \Pr_{S \sim \mathcal{D}^m} [\exists j \in [M_{\mathcal{A}} + 1] \text{ s.t. } R_{\mathcal{U}}(h_j; \mathcal{D}) > \varepsilon] \leq (M_{\mathcal{A}} + 1)(1 - \varepsilon)^{\frac{1}{\varepsilon} \log \left( \frac{M_{\mathcal{A}} + 1}{\delta} \right)} \leq \delta.$$

Therefore, with probability at least  $1 - \delta$  over  $S \sim \mathcal{D}^m$ , Algorithm 3 outputs a predictor  $h$  with robust risk  $R_{\mathcal{U}}(h; \mathcal{D}) \leq \varepsilon$ . Thus, Algorithm 3 robustly PAC learns  $\mathcal{C}$  w.r.t. adversary  $\mathcal{U}$ .  $\square$
